# Supplementary material
Source: PubMed Central journal article supplement (PMC7758887)
Supplement: ao0c03910_si_001.pdf [file ao0c03910_si_001.pdf]

## Supporting Information

### **Cerebrospinal fluid of preeclamptic and normotensive pregnant women compared to nonpregnant women analyzed with mass spectrometry**

Coşkun Güzel<sup>1</sup>, Caroline B. van den Berg<sup>2</sup>, Seppe Koopman<sup>3</sup>, Robbert Jan van Krugten<sup>3</sup>, Marcel Stoop<sup>1</sup>, Christoph Stingl<sup>1</sup>, Johannes J. Duvekot<sup>2</sup>, Theo M. Luider<sup>1\*</sup>

1) Laboratory of Neuro-Oncology/Clinical & Cancer Proteomics, Department of Neurology, Erasmus University Medical Center Rotterdam, The Netherlands

2) Department of Obstetrics and Gynecology, Erasmus University Medical Center Rotterdam, The Netherlands

3) Department of Anesthesiology, Maastad Hospital, Rotterdam, The Netherlands

**Conflicts of interest:** The authors report no conflict of interest

**Funding:** This research did not receive any specific grant from funding agencies in the public, commercial, or not-for-profit sectors

**Table S1.** Clinical characteristics.

| <b>General characteristics <sup>a)</sup></b>  |                  |                  |                  |          |
|-----------------------------------------------|------------------|------------------|------------------|----------|
|                                               | PE (n=30)        | CO (n=30)        | NP (n=29)        | P-value* |
| Maternal age (years)                          | 32 (29-35)       | 35 (32-37)       | 35 (29-40)       | 0.034    |
| <i>Ethnicity</i>                              |                  |                  |                  |          |
| Dutch                                         | 21 (67.7%)       | 20 (66.7%)       | 21 (72.4%)       | NS       |
| Other Western                                 | 0 (0)            | 2(6.7%)          | 2 (6.9%)         |          |
| Non Western                                   | 10 (32.3%)       | 8 (26.7%)        | 6 (20.7%)        |          |
| BMI (kg/m)                                    | 25.2 (21.6-30.4) | 23.2 (20.8-27.4) | 24.8 (22.4-29.3) | NS       |
| Smoking                                       |                  |                  |                  |          |
| Yes                                           | 0 (0%)           | 3 (10%)          | 8 (27.6%)        | 0.006    |
| No                                            | 26 (83.9%)       | 25 (83.3%)       | 21 (72.4)        |          |
| Missing                                       | 4 (12.9%)        | 2 (6.6%)         | 0 (0%)           |          |
| Highest systolic blood pressure (mm Hg)       | 170 (160-170)    | 120 (120-130)    | 120 (110-126)    | <0.001   |
| Highest diastolic blood pressure (mm Hg)      | 110 (100-110)    | 75 (70-80)       | 71 (67-80)       |          |
| <i>Medical history</i>                        |                  |                  |                  |          |
| Chronic hypertension                          | 4 (12.9%)        | 0 (0%)           | 0 (0%)           | 0.032    |
| Diabetes mellitus type 1                      | 2 (6.5%)         | 1 (3.3%)         | 0 (0%)           | NS       |
| Diabetes mellitus type 2                      | 0 (0%)           | 0 (0%)           | 0 (0%)           | NS       |
| <i>Obstetric history</i>                      |                  |                  |                  |          |
| Recurrent miscarriages                        | 1 (3.2%)         | 1 (3.3%)         | 0 (0%)           | NS       |
| PE in previous pregnancy                      | 5 (16.1%)        | 4 (13.3%)        | 0 (0%)           | NS       |
| <i>Current pregnancy</i>                      |                  |                  |                  |          |
| Nulliparous                                   | 20 (64.5%)       | 13 (43.3%)       | NA               | NS       |
| Gestational age sampling (days)               | 215 (209-254)    | 270 (266-272)    | NA               | <0.001   |
| Gestational diabetes                          | 1 (3.2%)         | 1 (3.3%)         | NA               | NS       |
| Twin pregnancy                                | 2 (6.5%)         | 1 (3.3%)         | NA               | NS       |
| <i>Phenotypes preeclampsia</i>                |                  |                  |                  |          |
| HELLP                                         | 7 (22.6%)        | NA               | NA               | NA       |
| Early-onset preeclampsia                      | 21 (67.7%)       | NA               | NA               | NA       |
| Use of magnesiumsulfate during sampling       | 25 (83%)         | NA               | NA               | NA       |
| <i>Child characteristics <sup>b)</sup></i>    |                  |                  |                  |          |
| Birth weight (g)                              | 1175 (930-2440)  | 3193 (2860-3490) | NA               | <0.001   |
| Birth weight percentile                       |                  |                  |                  |          |
| <10 <sup>th</sup> percentile                  | 10 (29.0%)       | 2 (6.7%)         | NA               | 0.037    |
| 10 <sup>th</sup> -90 <sup>th</sup> percentile | 22 (67.7%)       | 26 (86.7%)       | NA               |          |
| >90 <sup>th</sup> percentile                  | 1 (3.2%)         | 2 (6.7%)         | NA               |          |
| Neonatal death                                | 0 (0%)           | 2 (6.7%)         | NA               | NS       |
| Intrauterine fetal death                      | 0 (0%)           | 1 (3.3%)         | NA               | NS       |

a) Data are presented as median with IQR or count with percentage; b) Due to two twin pregnancies n = 32. \*For comparisons between groups Kruskal-Wallis 1-way ANOVA, Chi-square tests, and Fisher's exact tests were used. Patients were excluded who meet any of the following criteria: pregnant during inclusion, preeclampsia in history, auto-immune disorders, corticosteroid use, hemoglobinopathy or clotting disorder, chronic hypertension or proteinuria, kidney disorders, neurologic disorders.

**Table S2.** Differently abundant proteins (n=23) in CSF of normotensive pregnant and nonpregnant women analyzed using the Progenesis method without a Scopus score (known association with pregnancy).

| protein name                                    | gene name | up/down in pregnant women | fold change (CO/NP) |
|-------------------------------------------------|-----------|---------------------------|---------------------|
| ATP-binding cassette sub-family A member 2**    | ABCA2     | up                        | 1.89                |
| ADM (adrenomedullin)**                          | ADML      | up                        | 2.04                |
| 45 kDa calcium-binding protein*                 | SDF4      | up                        | 1.43                |
| gamma-enolase**                                 | ENO2      | up                        | 1.43                |
| growth arrest-specific protein 6**/**           | GAS6      | up                        | 2.50                |
| immunoglobulin superfamily member 21*           | IGSF21    | up                        | 1.43                |
| Inositol monophosphatase 3*                     | IMPAD1    | up                        | 1.47                |
| vesicular integral-membrane protein VIP36       | LMAN2     | up                        | 1.64                |
| lumican**                                       | LUM       | up                        | 1.69                |
| myeloid-derived growth factor*                  | MYDGF     | up                        | 1.96                |
| podocalyxin-like protein 2                      | PODXL2    | up                        | 2.00                |
| phosphatidylethanolamine-binding protein 1      | PEPB1     | up                        | 1.61                |
| profilin-1**/**                                 | PFN1      | up                        | 2.33                |
| proline-rich transmembrane protein 3            | PRRT3     | up                        | 1.52                |
| receptor-type tyrosine-protein phosphatase N2** | PTPR2     | up                        | 2.27                |
| extracellular sulfatase Sulf-2                  | SULF2     | up                        | 1.49                |
| transaldolase**                                 | TALDO1    | up                        | 2.33                |
| thioredoxin**                                   | TXN       | up                        | 1.92                |
| polyubiquitin-B*                                | UBB       | up                        | 2.08                |
| vasorin*                                        | VASN      | up                        | 1.67                |
| complement factor D**/**                        | CFD       | down                      | 0.41                |
| neuropilin-1**                                  | NRP1      | down                      | 0.75                |
| selenoprotein P**                               | SEPP1     | down                      | 0.58                |

CO=normotensive pregnant women.

NP= nonpregnant women.

\*Significantly different protein as analyzed by Benjamini-Hochberg ( $p < 0.0086$ ) using the Scaffold method.

\*\* Related to pregnancy (see Table 1).

**Table S3.** Differently abundant proteins (n=62) in CSF of normotensive pregnant and nonpregnant women analyzed using the Scaffold method without a Scopus score (known association with pregnancy).

| protein name                                                      | gene name                                | t-test    | up/down in pregnant women | fold change (CO/NP) | pregnancy hits | total literature hits |
|-------------------------------------------------------------------|------------------------------------------|-----------|---------------------------|---------------------|----------------|-----------------------|
| coagulation factor XIII B chain                                   | F13B                                     | 0.00031   | up                        | 3.09                | 0              | 166                   |
| calcium/calmodulin-dependent protein kinase type II subunit alpha | CAMK2A                                   | 0.00022   | up                        | 3.97                | 0              | 132                   |
| leucine-rich alpha-2-glycoprotein                                 | LRG1                                     | 0.00110   | up                        | 1.54                | 0              | 117                   |
| kallikrein-6                                                      | KLK6                                     | 0.00590   | down                      | 0.90                | 0              | 112                   |
| phosphoglycerate mutase 1                                         | PGAM1                                    | 0.00200   | up                        | 2.62                | 0              | 110                   |
| desmocollin-3                                                     | DSC3                                     | < 0.00010 | down                      | 0.24                | 0              | 103                   |
| parvalbumin alpha                                                 | PVALB                                    | 0.00039   | up                        | 4.26                | 0              | 89                    |
| voltage-dependent calcium channel subunit alpha-2/delta-1         | CACNA2D1                                 | < 0.00010 | up                        | 1.58                | 0              | 71                    |
| complement C1q subcomponent subunit C                             | C1QC                                     | 0.00088   | down                      | 0.73                | 0              | 63                    |
| dihydropteridine reductase                                        | QDPR                                     | 0.00048   | up                        | 3.46                | 0              | 60                    |
| beta-Ala-His dipeptidase                                          | CNDP1                                    | 0.00120   | up                        | 1.34                | 0              | 59                    |
| c-type mannose receptor 2                                         | MRC2                                     | 0.00016   | up                        | 3.26                | 0              | 57                    |
| protein FAM3C                                                     | FAM3C                                    | 0.00023   | up                        | 1.24                | 0              | 40                    |
| plasma serine protease inhibitor                                  | SERPINA5                                 | 0.00100   | down                      | 0.68                | 0              | 36                    |
| WAP four-disulfide core domain protein 1                          | WFDC1                                    | 0.00400   | down                      | 0.54                | 0              | 30                    |
| Ig kappa chain C region                                           | IGKC                                     | 0.00089   | down                      | 0.76                | 0              | 29                    |
| neurexophilin-1                                                   | NXPH1                                    | 0.00330   | up                        | 2.57                | 0              | 29                    |
| extracellular matrix protein 2                                    | ECM2                                     | < 0.00010 | down                      | 0.28                | 0              | 27                    |
| receptor-type tyrosine-protein phosphatase-like N                 | PTPRN                                    | 0.00024   | up                        | 1.84                | 0              | 27                    |
| WW domain-binding protein 2                                       | WBP2                                     | 0.00620   | up                        | 1.93                | 0              | 27                    |
| tetranectin                                                       | CLEC3B                                   | 0.00016   | down                      | 0.67                | 0              | 26                    |
| vasorin                                                           | VASN                                     | 0.00014   | up                        | 3.62                | 0              | 24                    |
| n-acetylmuramoyl-L-alanine amidase                                | PGLYRP2                                  | 0.00012   | down                      | 0.73                | 0              | 23                    |
| Ig kappa chain V-III region GOL                                   | Ig kappa chain V-III region GOL/IGKV3-20 | 0.00030   | down                      | 0.38                | 0              | 22                    |
| Ig kappa chain V-III region SIE                                   | Ig kappa chain V-III region SIE/IGKV3-20 | < 0.00010 | down                      | 0.27                | 0              | 22                    |
| Ig kappa chain V-III region Ti                                    | Ig kappa chain V-III region Ti/IGKV3-20  | 0.00560   | down                      | 0.59                | 0              | 22                    |
| zinc transporter ZIP10                                            | SLC39A10                                 | 0.00061   | down                      | 0.27                | 0              | 21                    |
| CD99 antigen-like protein 2                                       | CD99L2                                   | 0.00078   | up                        | 1.29                | 0              | 19                    |
| thyroxine-binding globulin                                        | SERPINA7                                 | < 0.00010 | up                        | 3.01                | 0              | 17                    |
| immunoglobulin lambda-like polypeptide 5                          | IGLL5                                    | 0.00810   | down                      | 0.78                | 0              | 16                    |
| olfactomedin-like protein 3                                       | OLFML3                                   | < 0.00010 | down                      | 0.19                | 0              | 16                    |
| scrapie-responsive protein 1                                      | SCRG1                                    | 0.00320   | up                        | 1.85                | 0              | 15                    |

|                                                            |                                               |           |      |      |   |    |
|------------------------------------------------------------|-----------------------------------------------|-----------|------|------|---|----|
| Ig alpha-1 chain C region                                  | IGHA1                                         | 0.00200   | down | 0.83 | 0 | 13 |
| Ig gamma-1 chain C region                                  | IGHG1                                         | 0.00530   | down | 0.83 | 0 | 13 |
| neural proliferation differentiation and control protein 1 | NPDC1                                         | < 0.00010 | up   | 2.32 | 0 | 13 |
| SH3 domain-binding glutamic acid-rich-like protein         | SH3BGRL                                       | 0.00190   | up   | 4.12 | 0 | 13 |
| Ig kappa chain V-II region RPMI 6410                       | Ig kappa chain V-II region RPMI 6410/IGKV2-30 | 0.00310   | down | 0.58 | 0 | 12 |
| seizure protein 6 homolog                                  | SEZ6                                          | 0.00710   | up   | 1.23 | 0 | 12 |
| complement C1q tumor necrosis factor-related protein 3     | C1QTNF3                                       | 0.00078   | down | 0.68 | 0 | 11 |
| Ig kappa chain V-I region Mev                              | Ig kappa chain V-I region Mev/IGKV1-39        | 0.00013   | down | 0.36 | 0 | 11 |
| protein FAM19A5                                            | FAM19A5                                       | 0.00034   | down | 0.55 | 0 | 11 |
| 45 kDa calcium-binding protein                             | SDF4                                          | 0.00170   | up   | 1.79 | 0 | 10 |
| proline-rich acidic protein 1                              | PRAP1                                         | < 0.00010 | up   | 4.05 | 0 | 10 |
| alpha-1-acid glycoprotein 2                                | ORM2                                          | 0.00620   | down | 0.82 | 0 | 9  |
| ganglioside GM2 activator                                  | GM2A                                          | 0.00650   | down | 0.75 | 0 | 9  |
| Ig lambda-2 chain C regions                                | IGLC2                                         | 0.00023   | down | 0.70 | 0 | 9  |
| immunoglobulin superfamily member 21                       | IGSF21                                        | 0.00018   | up   | 2.23 | 0 | 8  |
| inositol monophosphatase 3                                 | IMPAD1                                        | 0.00089   | up   | 1.54 | 0 | 8  |
| myeloid-derived growth factor                              | MYDGF                                         | 0.00150   | up   | 1.94 | 0 | 8  |
| alpha-mannosidase 2                                        | MAN2A1                                        | 0.00150   | up   | 2.62 | 0 | 7  |
| Ig lambda-3 chain C regions                                | IGLC3                                         | 0.00012   | down | 0.76 | 0 | 7  |
| polyubiquitin-B                                            | UBB                                           | 0.00041   | up   | 1.45 | 0 | 6  |
| Ig gamma-2 chain C region                                  | IGHG2                                         | 0.00044   | down | 0.79 | 0 | 5  |
| Ig kappa chain V-I region EU                               | Ig kappa chain V-I region EU/IGKV1-5          | 0.00600   | down | 0.76 | 0 | 5  |
| glycoprotein endo-alpha-1,2-mannosidase-like protein       | MANEAL                                        | 0.00420   | up   | 3.08 | 0 | 4  |
| Ig heavy chain V-III region BRO                            | Ig heavy chain V-III region BRO/IGHV3-13      | 0.00690   | down | 0.75 | 0 | 4  |
| protein shisa-7                                            | SHISA7                                        | 0.00180   | up   | 4.28 | 0 | 4  |
| sushi, nidogen and EGF-like domain-containing protein 1    | SNED1                                         | < 0.00010 | down | 0.28 | 0 | 4  |
| v-set and transmembrane domain-containing protein 2B       | VSTM2B                                        | 0.00086   | up   | 1.31 | 0 | 3  |
| complement C1q tumor necrosis factor-related protein 4     | C1QTNF4                                       | 0.00350   | down | 0.58 | 0 | 2  |
| Ig gamma-4 chain C region                                  | IGHG4                                         | 0.00290   | down | 0.78 | 0 | 2  |
| sushi domain-containing protein 5                          | SUSD5                                         | 0.00600   | up   | 1.49 | 0 | 2  |

*Proteins (n=62 out of 135) with zero counts (no association with pregnancy) for the weighted score as calculated in Table 2.*

*CO=normotensive pregnant women.*

*NP=nonpregnant women.*

**Table S4.** Comparison list of proteins found in our previous study with the current study. The significant differentially abundant proteins in CSF of preeclamptic patients of the previous work listed below showed the same trends (i.e., up- or downregulated) in this study using the Progenesis method, except the protein Insulin-like growth factor 2. The protein Amyloid-like protein 1 was not found in the current study.

| <b>higher abundant proteins (accession number)</b> | <b>fold change (PE/CO)</b> | <b>fold change (PE/CO) current study</b> |
|----------------------------------------------------|----------------------------|------------------------------------------|
| alpha-1-acid glycoprotein 1 (P02763)               | 1.54                       | 1.56                                     |
| alpha-1-antichymotrypsin (P01011)                  | 1.44                       | 1.43                                     |
| alpha-1B-glycoprotein (P04217)                     | 1.27                       | 1.08                                     |
| histidine-rich glycoprotein (P04196)               | 2.10                       | 2.63                                     |
| insulin-like growth factor 2 (P01344)              | 1.47                       | 0.83                                     |
| lumican (P51884)                                   | 1.54                       | 1.19                                     |
| protein AMBP (P02760)                              | 1.80                       | 1.59                                     |
| retinol-binding protein 4 (P02753)                 | 1.44                       | 1.41                                     |

  

| <b>lower abundant proteins (accession number)</b>             | <b>fold change (PE/CO)</b> | <b>fold change (PE/CO) current study</b> |
|---------------------------------------------------------------|----------------------------|------------------------------------------|
| Amyloid-like protein 1 (P51693)                               | 0.76                       | not found                                |
| Brain acid soluble protein 1 (P80723)                         | 0.64                       | 0.70                                     |
| Cadherin-13 (P55290)                                          | 0.68                       | 0.68                                     |
| Cartilage acidic protein 1 (Q9NQ79)                           | 0.93                       | 0.79                                     |
| Chromogranin-A (P10645)                                       | 0.67                       | 0.59                                     |
| Ephrin type-A receptor 4 (P54764)                             | 0.67                       | 0.70                                     |
| Glucosidase 2 subunit beta (P14314)                           | 0.80                       | 0.70                                     |
| Limbic system-associated membrane protein (Q13449)            | 0.79                       | 0.75                                     |
| Neural cell adhesion molecule (O15394)                        | 0.82                       | 0.83                                     |
| Neurocan core protein (O14594)                                | 0.78                       | 0.59                                     |
| Neuronal cell adhesion molecule (Q92823)                      | 0.75                       | 0.71                                     |
| Neurosecretory protein VGF (O15240)                           | 0.67                       | 0.63                                     |
| Neuroserpin (Q99574)                                          | 0.83                       | 0.63                                     |
| Protein kinase C-binding protein NELL2 (Q99435)               | 0.70                       | 0.71                                     |
| Pyruvate kinase PKM (P14618)                                  | 0.76                       | 0.75                                     |
| Seizure 6-like protein (Q9BYH1)                               | 0.89                       | 0.75                                     |
| V-set and transmembrane domain-containing protein 2A (B5MCX6) | 0.54                       | 0.74                                     |

*CO=normotensive pregnant women.*

*PE=preeclamptic women.*
